# Supplementary material for: Systematic Assessment of Clinical Methods to Diagnose and Monitor Diabetic Retinal Neuropathy
Source: Hindawi journal article supplement (doi:10.1155/2018/8479850), 2018-12-13
Supplement: f1 [file 8479850.f1.pdf]

## **Supplementary Data**

| Investigation or Measure                            | Number | Compelling | Moderate | Weak | No evidence despite investigation |
|-----------------------------------------------------|--------|------------|----------|------|-----------------------------------|
| Nyctometry                                          | 3      | 0          | 1        | 1    | 1                                 |
| Tear Analysis                                       | 3      | 0          | 3        | 0    | 0                                 |
| Pupillometry                                        | 4      | 4          | 0        | 0    | 0                                 |
| Lens Optical Density                                | 5      | 2          | 2        | 1    | 0                                 |
| Dark Adaptation                                     | 6      | 5          | 1        | 0    | 0                                 |
| Microalbuminuria                                    | 6      | 2          | 3        | 1    | 0                                 |
| Luminance threshold                                 | 6      | 5          | 1        | 0    | 0                                 |
| Scotopic threshold response                         | 7      | 4          | 2        | 0    | 1                                 |
| Mac capillary blood velocity                        | 10     | 7          | 3        | 0    | 0                                 |
| Corneal Confocal                                    | 10     | 3          | 7        | 0    | 0                                 |
| Flicker Perimetry (30Hz)                            | 10     | 9          | 0        | 1    | 0                                 |
| Time factors                                        | 11     | 4          | 7        | 0    | 0                                 |
| Capillary density in perifoveal intercapillary area | 12     | 11         | 1        | 0    | 0                                 |
| Scotopic b-wave                                     | 12     | 10         | 1        | 0    | 1                                 |
| ONH shape                                           | 14     | 13         | 0        | 1    | 0                                 |
| Vessel Caliber changes                              | 15     | 12         | 3        | 0    | 0                                 |
| HbA1c                                               | 17     | 5          | 10       | 1    | 1                                 |
| VEP                                                 | 18     | 16         | 2        | 0    | 0                                 |
| SWAP                                                | 20     | 17         | 2        | 1    | 0                                 |
| Visual Acuity                                       | 23     | 14         | 5        | 0    | 4                                 |
| PERG                                                | 25     | 16         | 6        | 3    | 0                                 |
| ITs                                                 | 29     | 25         | 3        | 0    | 1                                 |
| MfERG                                               | 29     | 27         | 2        | 0    | 0                                 |
| Ops (Oscillatory Potentials)                        | 30     | 23         | 5        | 1    | 1                                 |
| Perimetry                                           | 31     | 18         | 10       | 2    | 1                                 |
| Retinal thickness                                   | 32     | 13         | 16       | 1    | 2                                 |
| FFA                                                 | 36     | 21         | 14       | 1    | 0                                 |
| Contrast Sensitivity                                | 47     | 35         | 8        | 3    | 1                                 |

|                                                |     |    |    |   |   |
|------------------------------------------------|-----|----|----|---|---|
| OCT                                            | 47  | 23 | 19 | 4 | 1 |
| Colour Vision                                  | 55  | 39 | 11 | 5 | 0 |
| Electrophysiology                              | 78  | 69 | 8  | 1 | 0 |
| Retinopathy<br>detection<br>software           | 83  | 60 | 22 | 1 | 0 |
| Digital fundus<br>photography                  | 99  | 67 | 31 | 1 | 0 |
| Retinal image<br>processing<br>(including SVP) | 100 | 69 | 31 | 0 | 0 |

**Supplementary Table 1 – Number of studies demonstrating evidence of change in pre- or early diabetic retinopathy (total raw data). The first numeric column demonstrates the total number of times a metric was used to demonstrate damage to the pre-retinopathy diabetic retina. The subsequent columns demonstrate the division of that number into instances of compelling, indicative, moderate, weak, and no significant evidence of neural retinal damage.**
